# Supplementary material for: Humic acid-based biomass-derived magnetic nanocomposites modified by a deep eutectic solvent for the efficient adsorption of trypsin
Source: Royal Society of Chemistry journal article supplement (doi:10.1039/d3nj05602c), 2024-01-01
Supplement: d3nj05602c1.pdf [file d3nj05602c1.pdf]

## Electronic Supplementary Information

**Humic acid-based biomass-derived magnetic nanocomposites modified by deep eutectic solvent for the efficient adsorption of trypsin**

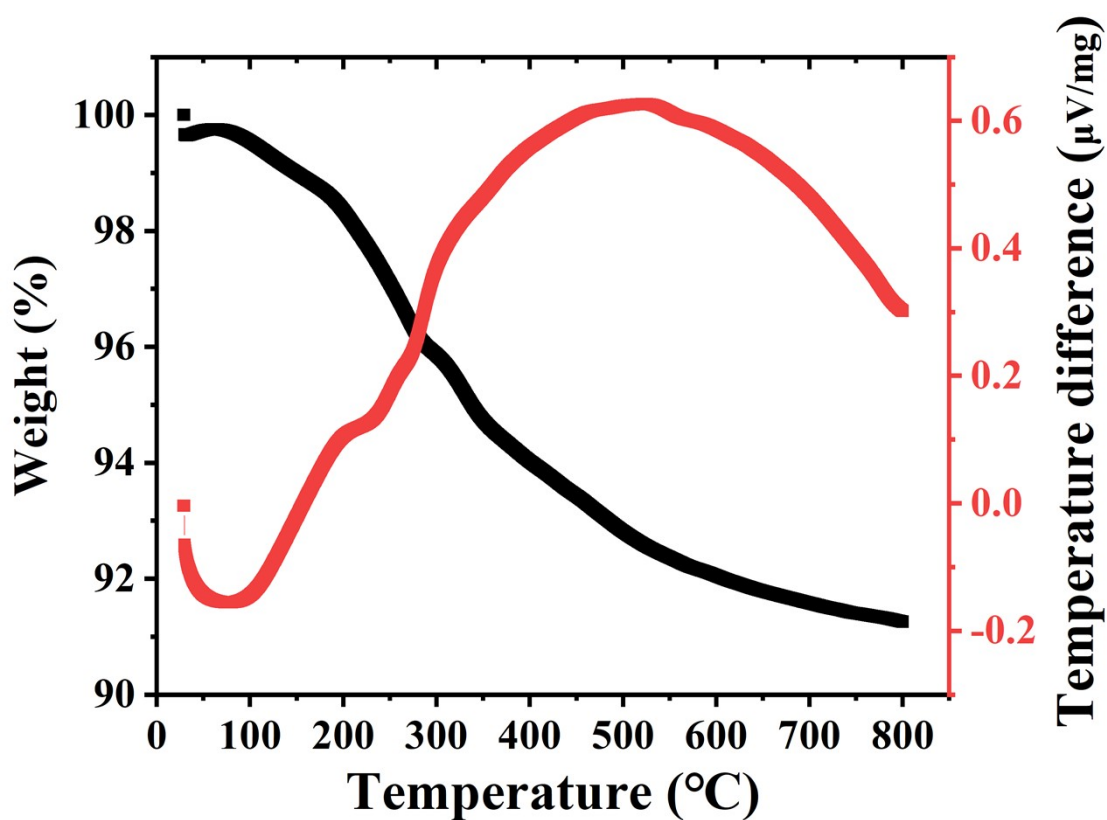

**Fig. S1** The thermogravimetric differential curves of Fe<sub>3</sub>O<sub>4</sub>-HA.

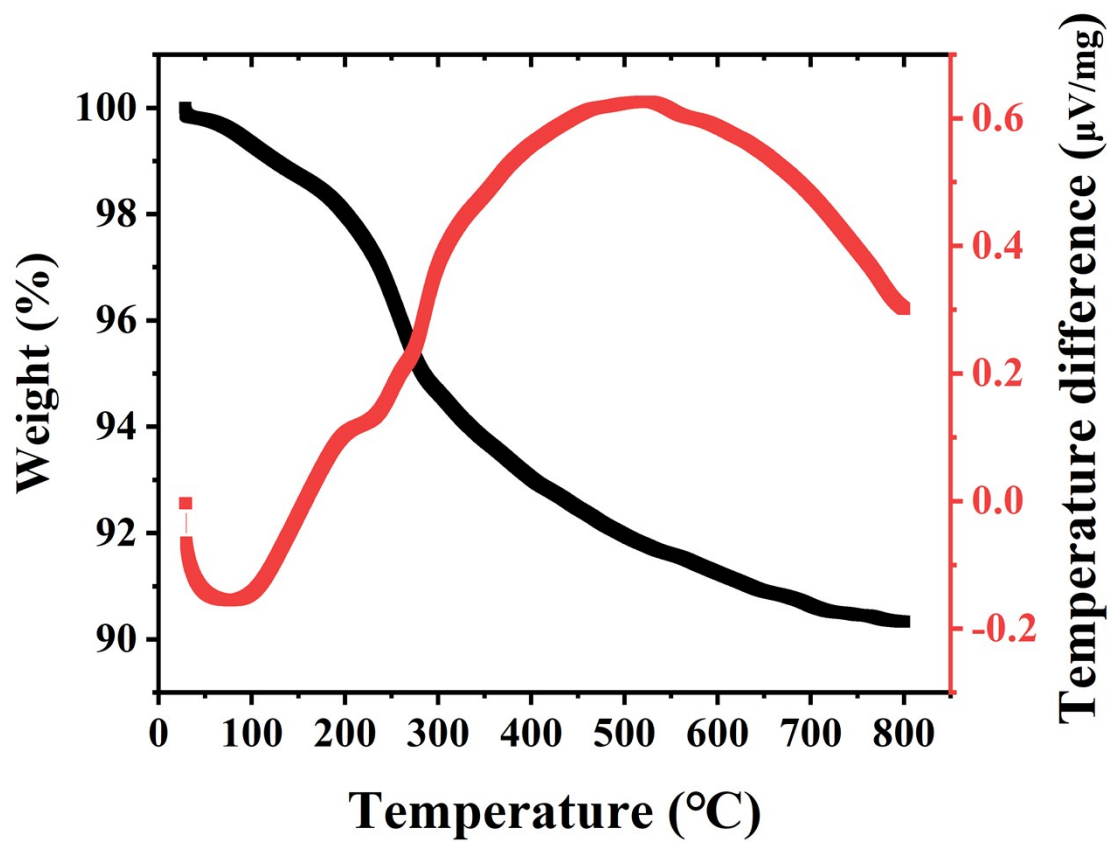

Fig. S2 The thermogravimetric differential curves of Fe<sub>3</sub>O<sub>4</sub>-HA@[TEAC][G].
